# Supplementary material
Source: HighWire-hosted journal article supplement (https://bmjopen.bmj.com/content/11/10/e052274)
Supplement: inline-supplementary-material-1 [file inline-supplementary-material-1.pdf]

**eTable 1** Searching strategies for electronic databases

| Databases            | Searching strategies                                                                                                                                                                                                                                                                                                                                                                                                                                                                                                                                                                                                                                     | Results (n) |
|----------------------|----------------------------------------------------------------------------------------------------------------------------------------------------------------------------------------------------------------------------------------------------------------------------------------------------------------------------------------------------------------------------------------------------------------------------------------------------------------------------------------------------------------------------------------------------------------------------------------------------------------------------------------------------------|-------------|
| PubMed               | #1. Uric Acid [Mesh] OR Uric Acid [Title/Abstract] OR serum uric acid [Title/Abstract]<br>#2. Mortality [Mesh] OR Mortality [Title/Abstract]<br>#3. Peritoneal Dialysis [Mesh] OR Peritoneal Dialysis [Title/Abstract] OR PD [Title/Abstract] OR continuous ambulatory PD [Title/Abstract] OR CAPD [Title/Abstract] OR intermittent PD [Title/Abstract] OR IPD [Title/Abstract] OR automated PD [Title/Abstract] OR APD [Title/Abstract] OR continuous cyclic PD [Title/Abstract] OR CCPD [Title/Abstract] OR tidal PD [Title/Abstract] OR TPD [Title/Abstract]<br>#4. #1 AND #2 AND #3                                                                  | 33          |
| The Cochrane library | #1. Uric Acid [Title/Abstract/Keywords] OR serum uric acid [Title/Abstract/Keywords]<br>#2. Mortality [Title/Abstract/Keywords]<br>#3. Peritoneal Dialysis [Title/Abstract/Keywords] OR PD [Title/Abstract/Keywords] OR continuous ambulatory PD [Title/Abstract/Keywords] OR CAPD [Title/Abstract/Keywords] OR intermittent PD [Title/Abstract/Keywords] OR IPD [Title/Abstract/Keywords] OR automated PD [Title/Abstract/Keywords] OR APD [Title/Abstract/Keywords] OR continuous cyclic PD [Title/Abstract/Keywords] OR CCPD [Title/Abstract/Keywords] OR tidal PD [Title/Abstract/Keywords] OR TPD [Title/Abstract/Keywords]<br>#4. #1 AND #2 AND #3 | 10          |
| EMBASE               | #1. (Uric Acid OR serum uric acid).ab,ti<br>#2. (Mortality).ab,ti<br>#3. (Peritoneal Dialysis OR PD OR continuous ambulatory PD OR CAPD OR intermittent PD OR IPD OR automated PD OR APD OR continuous cyclic PD OR CCPD OR tidal PD OR TPD).ab,ti<br>#4. #1 AND #2 AND #3                                                                                                                                                                                                                                                                                                                                                                               | 105         |
| Web of Science       | #1. Uric Acid OR serum uric acid [Topic]<br>#2. Mortality [Topic]<br>#3. Peritoneal Dialysis OR PD OR continuous ambulatory PD OR CAPD OR intermittent PD OR IPD OR automated PD OR APD OR continuous cyclic PD OR CCPD OR tidal PD OR TPD [Topic]<br>#4. #1 AND #2 AND #3                                                                                                                                                                                                                                                                                                                                                                               | 55          |
| Chinese databases:   | #1. niaosuan (uric acid,尿酸) OR xueniaosuan (serum uric acid,血尿酸)                                                                                                                                                                                                                                                                                                                                                                                                                                                                                                                                                                                         | CNKI:18     |

---

|                                 |                                                                                                                                                                                                                                                          |                                  |
|---------------------------------|----------------------------------------------------------------------------------------------------------------------------------------------------------------------------------------------------------------------------------------------------------|----------------------------------|
| CNKI, SinoMed,<br>VIP, Wan Fang | #2. siwanglv (mortality,死亡率)<br>#3. fumotouxi (peritoneal dialysis,腹膜透析) OR lianxuxingfeiwochuangfumotouxi (continuous ambulatory peritoneal dialysis,连续性非卧床腹膜透析) OR zidonghuafumotouxi (automated peritoneal dialysis,自动化腹膜透析)<br>#4. #1 AND #2 AND # 3 | SinoMed:5<br>VIP:2<br>WanFang:14 |
|---------------------------------|----------------------------------------------------------------------------------------------------------------------------------------------------------------------------------------------------------------------------------------------------------|----------------------------------|

---
