# Supplementary material
Source: HighWire-hosted journal article supplement (https://bmjopen.bmj.com/content/11/10/e052274)
Supplement: inline-supplementary-material-2 [file inline-supplementary-material-2.pdf]

**Table 2** Methodological quality assessment of the cohort studies utilizing the Newcastle-Ottawa Scale (NOS)

| Study ID          | Selection                           |                                         |                           |                                                              | Comparability | Outcome                                                    |                       |                       | Total score |
|-------------------|-------------------------------------|-----------------------------------------|---------------------------|--------------------------------------------------------------|---------------|------------------------------------------------------------|-----------------------|-----------------------|-------------|
|                   | Representativeness of exposed group | Representativeness of non-exposed group | Ascertainment of exposure | Demonstration that outcome was not present at start of study |               | Comparability of groups on the basis of design or analysis | Assessment of outcome | Follow up long enough |             |
| Sheng F 2013[25]  | ☆                                   | ☆                                       | ☆                         | ☆                                                            | ☆             | ☆                                                          | ☆                     | -                     | 7           |
| Jie D 2014[14]    | ☆                                   | ☆                                       | ☆                         | ☆                                                            | ☆             | ☆                                                          | ☆                     | ☆                     | 8           |
| Xi X 2016[21]     | ☆                                   | ☆                                       | ☆                         | ☆                                                            | ☆             | ☆                                                          | ☆                     | ☆                     | 8           |
| Eunjin B2016[26]  | ☆                                   | ☆                                       | ☆                         | ☆                                                            | -             | ☆                                                          | ☆                     | ☆                     | 7           |
| ChangWX2018[27]   | ☆                                   | ☆                                       | ☆                         | ☆                                                            | ☆             | ☆                                                          | ☆                     | ☆                     | 8           |
| ZhangQL2018[28]   | ☆                                   | ☆                                       | ☆                         | ☆                                                            | ☆             | ☆                                                          | ☆                     | -                     | 7           |
| Lai KJ 2018[29]   | ☆                                   | ☆                                       | ☆                         | ☆                                                            | ☆☆            | ☆                                                          | ☆                     | ☆                     | 9           |
| Yang FY 2018 [30] | ☆                                   | ☆                                       | ☆                         | ☆                                                            | ☆             | ☆                                                          | ☆                     | -                     | 7           |
| ChangWX2019[31]   | ☆                                   | ☆                                       | ☆                         | ☆                                                            | ☆             | ☆                                                          | ☆                     | -                     | 7           |
| Xiang SL 2019[32] | ☆                                   | ☆                                       | ☆                         | ☆                                                            | ☆             | ☆                                                          | ☆                     | ☆                     | 8           |
| Qiu SF 2020[33]   | ☆                                   | ☆                                       | ☆                         | ☆                                                            | ☆             | ☆                                                          | ☆                     | -                     | 7           |
| Coelho I 2020[34] | ☆                                   | ☆                                       | ☆                         | ☆                                                            | ☆             | ☆                                                          | ☆                     | -                     | 7           |
| Naoki S 2020[35]  | ☆                                   | ☆                                       | ☆                         | ☆                                                            | ☆             | ☆                                                          | ☆                     | ☆                     | 8           |
| Xiao X 2020[22]   | ☆                                   | ☆                                       | ☆                         | ☆                                                            | ☆             | ☆                                                          | ☆                     | ☆                     | 8           |
